# Supplementary material for: Discovery and Functional Characterization of Two Regulatory Variants Underlying Lupus Susceptibility at 2p13.1
Source: MDPI journal article supplement (doi:10.3390/genes13061016), 2022-06-05
Supplement: s1 [file s1]

Discovery and functional characterization of two regulatory variants underlying lupus susceptibility at 2p13.1

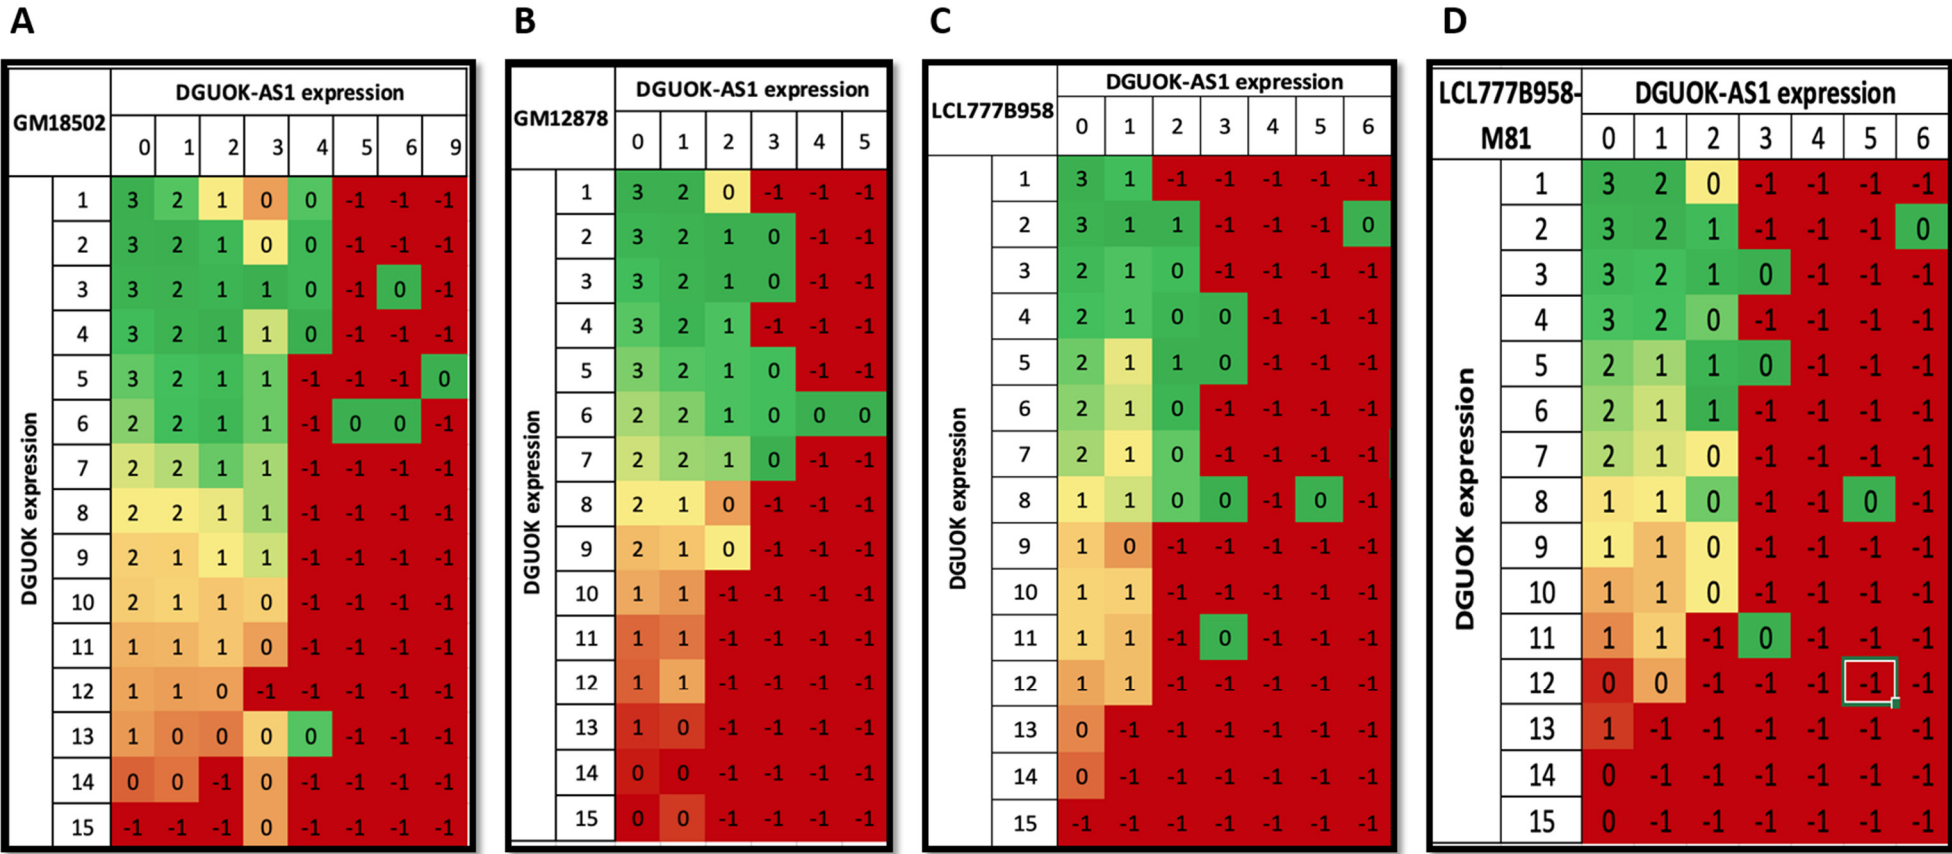

**Supplementary Figure S1.** Relationship between expression levels of *DGUOK* and *DGUOK-AS1* across four Coriell lines studied with single-cell RNA-seq

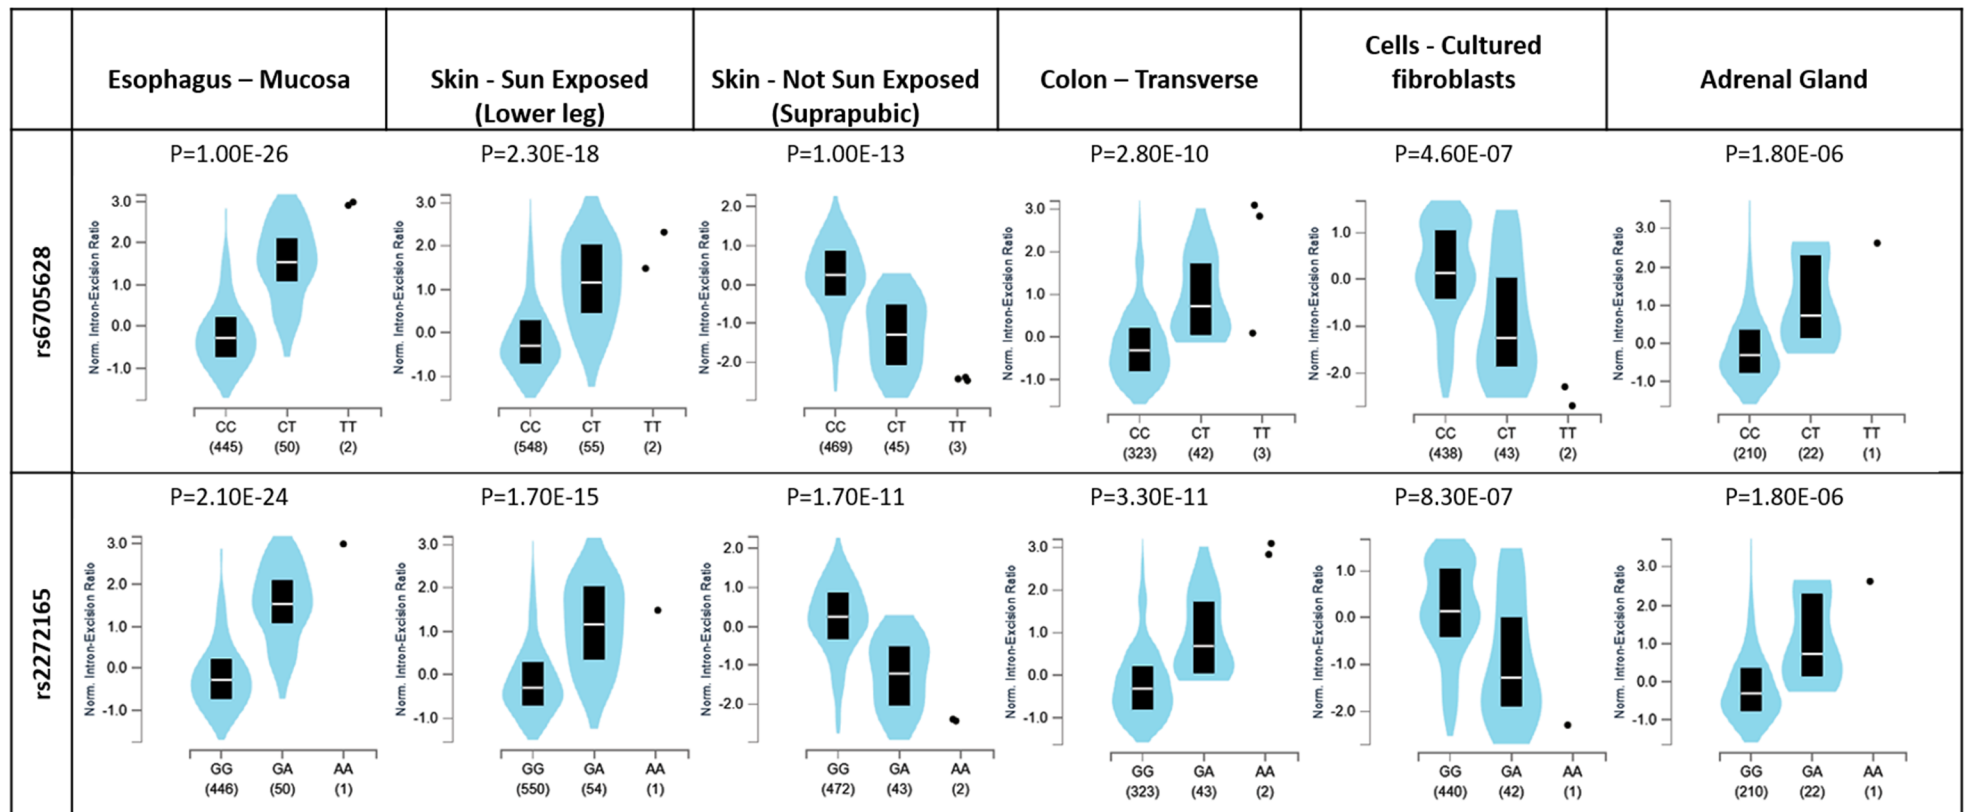

**Supplementary Figure S2.** GTex (V8) data show significant sQTLs to anti-sense RNA *DGUOK-AS1* across multiple tissues with rs6705628 (top row) and rs2272165 (bottom row)
